# Supplementary material for: Effect of Ultraviolet Radiation on Reducing Airborne Escherichia coli Carried by Poultry Litter Particles
Source: MDPI journal article supplement (doi:10.3390/ani12223170), 2022-11-16
Supplement: s1 [file s1]

**Table S1.** Concentration of airborne *E. coli* without UV irradiance treatment.

| <b>Contact Times<br/>(s, mean <math>\pm</math> SD)</b> | <b><i>E. coli</i> Concentration in Upstream<br/>Chamber<br/>(log<sub>10</sub> CFU m<sup>-3</sup>, mean <math>\pm</math> SD)</b> | <b><i>E. coli</i> Concentration in<br/>Downstream Chamber<br/>(log<sub>10</sub> CFU m<sup>-3</sup>, mean <math>\pm</math> SD)</b> |
|--------------------------------------------------------|---------------------------------------------------------------------------------------------------------------------------------|-----------------------------------------------------------------------------------------------------------------------------------|
| 5.62 $\pm$ 0.91                                        | 7.1 $\pm$ 0.2                                                                                                                   | 6.3 $\pm$ 0.7                                                                                                                     |
| 1.2 $\pm$ 0.06                                         | 6.6 $\pm$ 0.1                                                                                                                   | 5.9 $\pm$ 0.1                                                                                                                     |
| 0.34 $\pm$ 0.01                                        | 6.5 $\pm$ 0.6                                                                                                                   | 5.6 $\pm$ 0.3                                                                                                                     |
| 0.23 $\pm$ 0.01                                        | 6.2 $\pm$ 0.7                                                                                                                   | 5.2 $\pm$ 0.1                                                                                                                     |

**Table S2.** Concentration of airborne *E. coli* with UV irradiance treatment.

| Contact Times<br>(s, mean $\pm$ SD) | Number of<br>UV Lamps | <i>E. coli</i> Concentration in<br>Upstream Chamber<br>(log <sub>10</sub> CFU m <sup>-3</sup> , mean $\pm$ SD) | <i>E. coli</i> Concentration in<br>Downstream Chamber<br>(log <sub>10</sub> CFU m <sup>-3</sup> , mean $\pm$ SD) |
|-------------------------------------|-----------------------|----------------------------------------------------------------------------------------------------------------|------------------------------------------------------------------------------------------------------------------|
| 5.62 $\pm$ 0.91                     | 1                     | 7.0 $\pm$ 0.3                                                                                                  | 3.4 $\pm$ 0.3                                                                                                    |
|                                     | 2                     | 7.1 $\pm$ 0.2                                                                                                  | 3.0 $\pm$ 0.5                                                                                                    |
| 1.2 $\pm$ 0.06                      | 1                     | 7.0 $\pm$ 0.0                                                                                                  | 5.0 $\pm$ 0.0                                                                                                    |
|                                     | 2                     | 6.8 $\pm$ 0.1                                                                                                  | 4.6 $\pm$ 0.1                                                                                                    |
| 0.34 $\pm$ 0.01                     | 1                     | 6.9 $\pm$ 0.1                                                                                                  | 5.0 $\pm$ 0.1                                                                                                    |
|                                     | 2                     | 6.6 $\pm$ 0.2                                                                                                  | 4.5 $\pm$ 0.2                                                                                                    |
| 0.23 $\pm$ 0.01                     | 1                     | 6.6 $\pm$ 0.1                                                                                                  | 5.2 $\pm$ 0.0                                                                                                    |
|                                     | 2                     | 6.2 $\pm$ 0.3                                                                                                  | 4.6 $\pm$ 0.2                                                                                                    |
